# Supplementary material for: Structural investigation of aluminium doped ZnO nanoparticles by solid-state NMR spectroscopy
Source: Royal Society of Chemistry journal article supplement (doi:10.1039/c2cp41139c), 2012-01-01
Supplement: c2cp41139c.pdf [file c2cp41139c.pdf]

**Supporting Information to**  
**"Structural Investigation of Aluminium Doped ZnO**  
**Nanoparticles by Solid State Spectroscopy"**

*Yamini S. Avadhut* <sup>[a]</sup>, *Johannes Weber* <sup>[a]</sup>, *Elin Hammarberg* <sup>[b]</sup>, *Claus Feldmann* <sup>[b]</sup>,

*Jörn Schmedt auf der Günne* <sup>\*[a]</sup>

<sup>[a]</sup> Ludwig-Maximilians-Universität München, Department Chemie,

Butenandtstraße 5-13 (D), D-81377 München, Germany

<sup>[b]</sup> Institut für Anorganische Chemie, Karlsruhe Institute of Technology (KIT),

Engesserstraße 15, D-76131 Karlsruhe, Germany.

Table of Contents

1. SEM images of various AZO samples.....3

2. <sup>1</sup>H MAS NMR.....4

3. <sup>13</sup>C CPMAS NMR.....5

4. 2D <sup>1</sup>H{<sup>13</sup>C} Correlation NMR.....5

5. <sup>27</sup>Al{<sup>1</sup>H} 2D HETCOR.....6

6. Computational Details.....7

    6.1. Structure optimizations.....7

        6.1.1. The Al<sub>Zn</sub> defect site.....10

        6.1.2. The Al<sub>i,Td</sub> interstitial site.....15

        6.1.3. Optimization of the Al<sub>i,Oh</sub> interstitial site.....16

        6.1.4. Optimization of the [Al<sub>2</sub>V<sub>Zn</sub>] defect site .....17

    6.2. Calculation of <sup>27</sup>Al NMR parameters by EEIM.....20

7. References.....25

## 1. SEM images of various AZO samples

Scanning electron microscopy (SEM) investigations on as-prepared AZO samples (1.0, 1.8 and 4.9 mol-%) were carried out with a Zeiss Supra 40 VP microscope (see Figure S1). Diluted suspensions in DEG were deposited on silicon wafers, evaporated and sputtered with Pt. The acceleration voltage and the working distance were 10 kV and 3 mm, respectively. Statistical evaluation of particle size and size distribution was performed based on the software package Scandium 5.0 from Soft Imaging Systems.

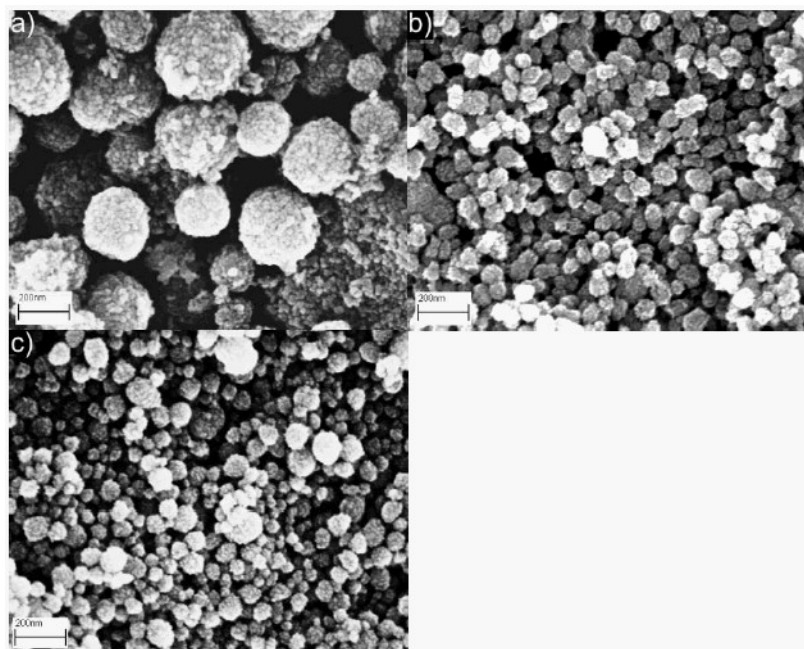

**Figure S1:** SEM images of AZO-ap samples with Al:Zn molar ratios of a) 1 %, b) 1.8 % and c) 4.9 %; powders redispersed in ethanol.

## 2. $^1\text{H}$ MAS NMR

Figure S2 shows comparison of quantitative  $^1\text{H}$  MAS NMR spectra of aluminium doped zinc oxide (1.8 mol-%) with different heat treatment namely as-prepared AZO (a), oxidized at 400 °C (b), reduced with forming gas (c), and heated at 800 °C (d), respectively. It is observed that, against the common perception, the DEG/organic components have not fully vanished after heat treatment at 400 °C. Observable are peaks stemming from acetate ( $\text{CH}_3$ -function  $\sim 1.2$  ppm) and DEG ( $\text{CH}_2$ -functions: 3.59 ppm and 3.74 ppm, OH broad peak  $\sim 4.5$  ppm)

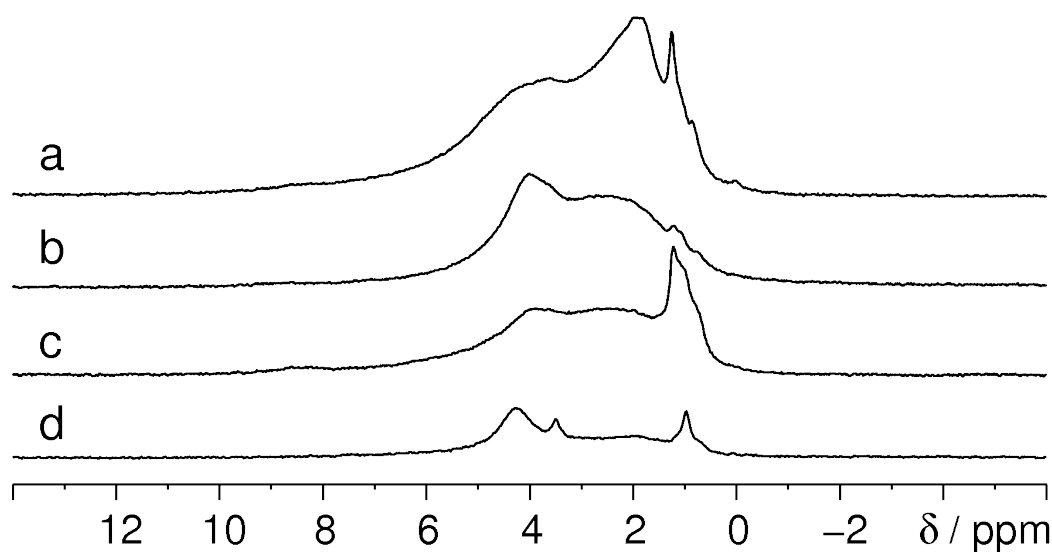

**Figure S2:** Quantitative  $^1\text{H}$  MAS NMR spectra of aluminium doped zinc oxide (AZO-ap, 1.8 mol-%): (a) as-prepared, (b) heated at 400 °C, (c) reduced with forming gas, and (d) heated at 800 °C with direct excitation at a sample spinning frequency of 50 kHz using a recycle delay of 8 s; approximately the same amount of sample was packed into the rotors and similar experimental conditions were applied.

### 3. $^{13}\text{C}$ CPMAS NMR

$^{13}\text{C}\{^1\text{H}\}$  CPMAS NMR spectrum of as-prepared aluminium doped zinc oxide (1.8 mol-%) is shown in Figure S3 which is discussed in details in the main article. The peaks at 180.2 ppm and 20.9 ppm belong to acetic acid. The peaks at 71.8 and 61.4 ppm are assigned to  $\text{CH}_2$  function of DEG.

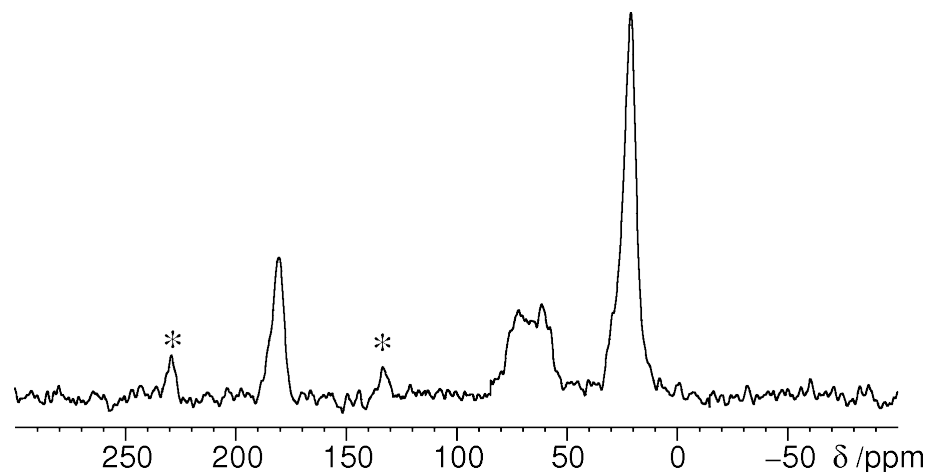

**Figure S3:**  $^{13}\text{C}\{^1\text{H}\}$  CPMAS NMR spectrum of aluminium doped zinc oxide, (AZO-ap, 1.8 mol-%) recorded with a 1 ms contact time, recycle delay of 3 s, at a field of 11.74 T and a sample spinning frequency of 6 kHz; spinning sidebands are marked by asterisk.

### 4. 2D $^1\text{H}\{^{13}\text{C}\}$ Correlation NMR

Due to limited resolution of  $^1\text{H}$  MAS NMR (Figure S2) a peak assignment requires a two dimensional  $^1\text{H}\{^{13}\text{C}\}$  correlation method. The correlation is achieved by using inverse detection heteronuclear correlation spectroscopy.<sup>1</sup> In this experiment, the  $^{13}\text{C}$  dimension is indirectly observed by detecting on  $^1\text{H}$  nuclei. Figure S4 shows the inversely detected 2D  $^1\text{H}\{^{13}\text{C}\}$  heteronuclear correlation spectrum of as-prepared AZO (1 mol-%). Figure S4 shows a correlation peak between methyl  $^1\text{H}$  (1.2 ppm) and methyl  $^{13}\text{C}$  (20.9 ppm) of acetate, which reflects the proximity of the methyl  $^{13}\text{C}$  and methyl  $^1\text{H}$  groups. This correlation peak confirms the presence of acetate in as-prepared aluminium doped zinc oxide nanoparticles.

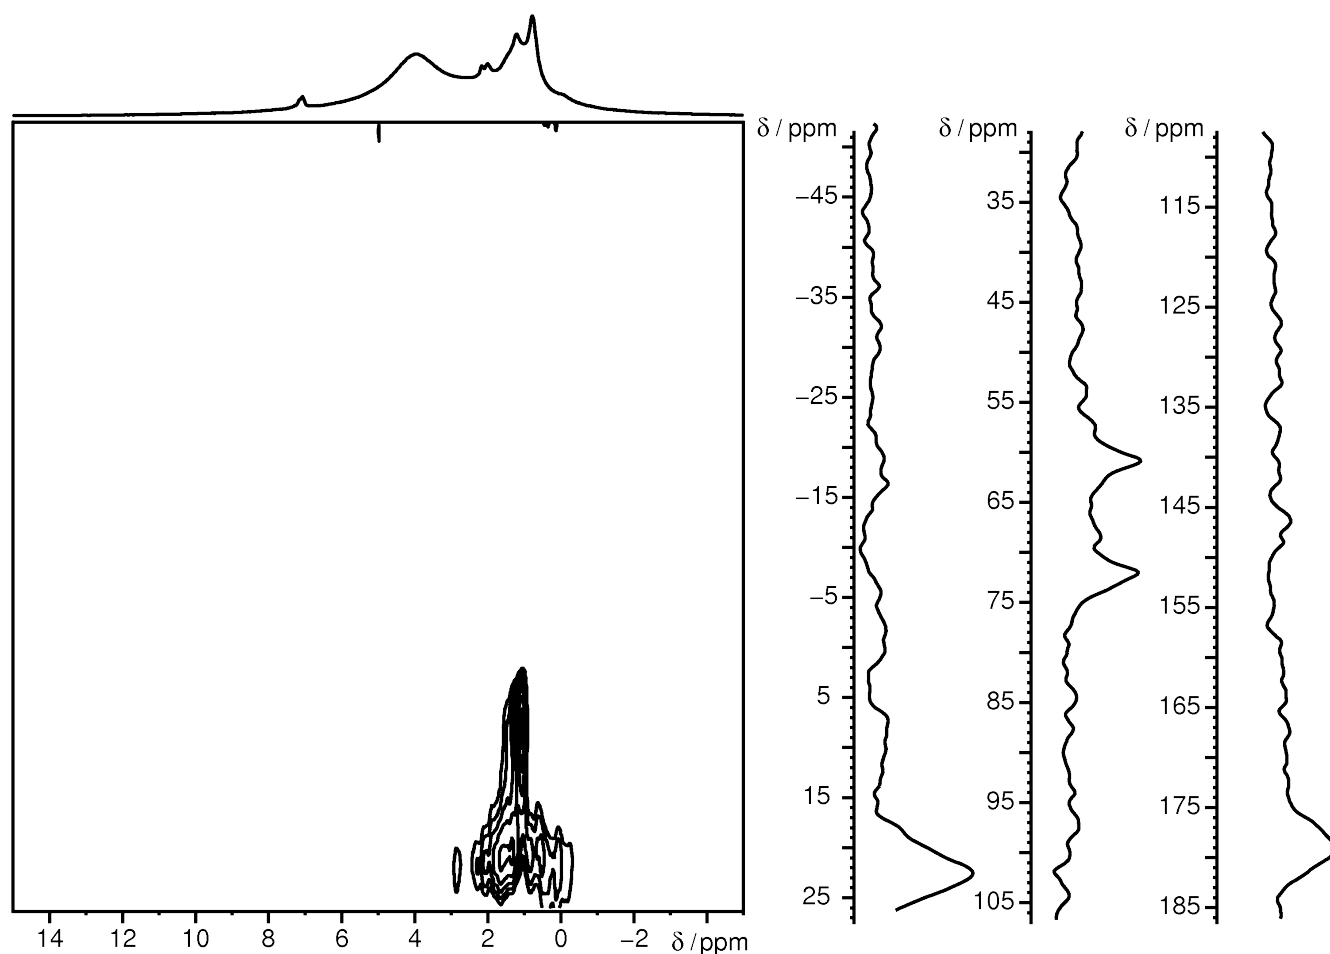

**Figure S4:** A 2D  $^1\text{H}\{^{13}\text{C}\}$  correlation spectrum obtained with inverse detection of aluminum doped zinc oxide, (AZO-ap, 1 mol-%), recorded under MAS at 10 kHz, with 3 ms contact time, recycle delay of 2 s, at a magnetic field of 11.74 T. The projections were taken from separate 1D  $^1\text{H}$  MAS and  $^{13}\text{C}\{^1\text{H}\}$  CP-MAS experiments.

## 5. $^{27}\text{Al}\{^1\text{H}\}$ 2D HETCOR

Figure S5 shows the 2D  $^{27}\text{Al}\{^1\text{H}\}$  PRESTO-III spectra of AZO-ox-400 (1.8 mol %) and AZO-red (1.8 mol %). Both spectra show site connectivities between the components  $\text{Al}_\text{B}^{(\text{IV})}$ ,  $\text{Al}^\text{V}$ , and  $\text{Al}^{(\text{VI})}$  and the  $^1\text{H}$  NMR signals from DEG and acetic acid/acetate. Hence, the 2D  $^{27}\text{Al}\{^1\text{H}\}$  PRESTO-III spectra reconfirm the presence of DEG and acetic acid/acetate even after heat treatment at 400 °C and reductive treatment.

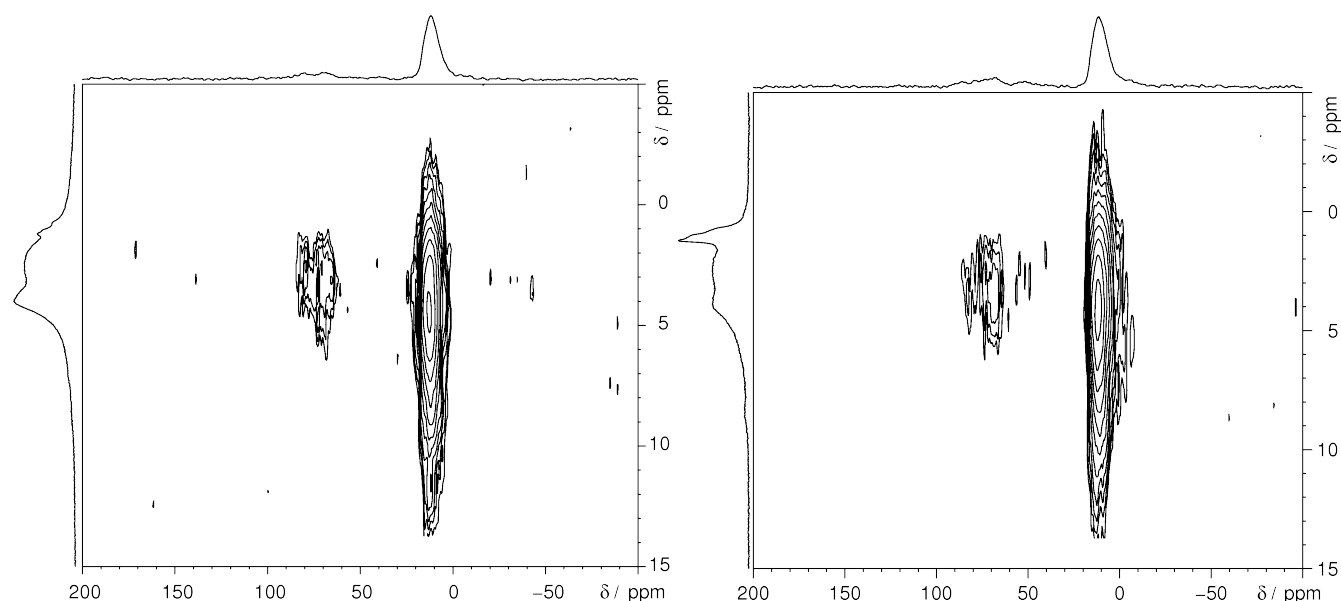

**Figure S5:**  $^{27}\text{Al}\{^1\text{H}\}$  2D HETCOR spectra of aluminum doped zinc oxide nanoparticles. *left:* AZO-ox-400 (1.8 mol %), *right:* AZO-red (1.8 mol %). Spectra were acquired at a field of 11.74 T and a spinning frequency of 10 kHz using a  $^1\text{H}$ - $^{27}\text{Al}$  PRESTO-III pulse sequence (detailed explanation in the main article); the  $^1\text{H}$  projection was taken from separate 1D single-pulse excitation experiment; additionally, a sum projection of the 2D PRESTO-III projection is shown for the  $^{27}\text{Al}$  dimension.

## 6. Computational Details

This section provides further details on the performed computations, which had to be removed from the main text for brevity. Part of it is redundant with the main text in order to enhance readability.

### 6.1. Structure optimizations

Calculations were performed by a supercell approach under periodic boundary conditions with the VASP program, version 4.6.28, at PBE/PAW level as described in the main text. Here, we mention further details. The tetrahedron method with Blöchl's corrections<sup>2</sup> was used for Brillouin-zone integration. Electronic wave functions were considered as converged if the energy change in subsequent SCF cycles was below  $10^{-8}$  eV. The Quasi-Newton method was used to derive structural relaxation steps.

Starting from the default, *wurtzite*-like ZnO structure of Heller *et al.*<sup>3</sup> (ICSD 76641) that has space

group symmetry  $P6_3mc$  (No 186), cell parameters of  $a = b = 3.2495 \text{ \AA}$ ,  $c = 5.2069 \text{ \AA}$ ,  $\alpha = \beta = 90^\circ$ ,  $\gamma = 120^\circ$  and four atoms per unit cell, the supercell was chosen as a  $3 \times 3 \times 2$  expansion of the ZnO cell, thus containing 36 Zn-atoms and 36 O-atoms. Subsequently, one of the point defects was built in and various partial structure optimizations were performed (Al-atoms only, Al plus 1<sup>st</sup> coordination sphere, Al plus 1<sup>st</sup> and 2<sup>nd</sup> coordination sphere) as well as full optimizations of all fractional coordinates. Supercell parameters were kept constant at  $a = b = 9.7485 \text{ \AA}$ ,  $c = 10.4138 \text{ \AA}$  in all calculations. The energy dependence on various automatically generated  $k$ -point grids according to the *Monkhorst-Pack* scheme<sup>4</sup> was tested. Finally, a  $\Gamma$ -centered  $k$ -point grid with four points in each direction ( $4 \times 4 \times 4$ ) was used, which turned out to be sufficiently dense to yield absolute energy convergence of  $\text{AlZn}_{35}\text{O}_{36}$  to 0.003 eV (= 4 kJ/mol). Symmetries of the doped supercells were initially maintained at  $P3m1$  (No. 156) for  $\text{Al}_{\text{Zn}}$ ,  $\text{Al}_{i,Td}$ ,  $\text{Al}_{i,Oh}$  during the optimizations, but were released subsequently to  $P1$  (No 1) by slight displacements of the dopant in order to check for Jahn-Teller-distortions<sup>5</sup> of lower energy. The three variants of the  $[\text{Al}_2V_{\text{Zn}}]$ -defect and the defect combinations  $[\text{Al}_{i,Td}V_{\text{Zn}}]$ ,  $[\text{Al}_{i,Oh}V_{\text{Zn}}]$  were treated in space group  $P1$ .

Also, the number of valence electrons ( $e_{\text{val}}^-$ ) was varied in order to investigate its influence on the defect structure. By default each elemental Zn has 12  $e_{\text{val}}^-$ , each elemental O 6  $e_{\text{val}}^-$  and each elemental Al 3  $e_{\text{val}}^-$  within the calculation scheme, resulting in 639  $e_{\text{val}}^-$  for  $\text{AlZn}_{35}\text{O}_{36}$ , i.e. the electroneutral cell is an open-shell system with one unpaired electron. However, if we consider the substitution as an exchange of  $\text{Zn}^{2+}$  by  $\text{Al}^{3+}$  the number of electrons is reduced to 638  $e_{\text{val}}^-$  (this could be termed as  $p$ -type doping). On the other hand, if we want to consider a more  $n$ -doped system with a closed-shell configuration, we need 640  $e_{\text{val}}^-$ , which would correspond to an exchange of  $\text{Zn}^{2+}$  with  $\text{Al}^+$ , formally. For all three types of doping, spin-polarization free calculations have been performed on  $\text{Al}_{\text{Zn}}$ . By default, deviations from charge neutrality within a unit cell are compensated in VASP by defining a homogeneously distributed counter charge (*jellium background*). No compensation mechanism for higher electrical moments is used. Table S1 gives an overview of the performed calculations as well as their energies in col. 6. The structural effects are discussed in the subsequent paragraphs, CIF files for each optimized structure are delivered with this document. CIF file names are chosen according to the calculation number in Table S1.

**Table S1:** Total energies of 3x3x2 supercells with various defects as calculated at PBE/PAW level in VASP (col. 6). Col. 1 holds the calculation number, col. 2 the defect type, col. 3 the relaxed part of the supercell, col. 4 the assumed cell symmetry, col. 5 the number of valence electrons per unit cell, col. 7 the number of k-points in the directions of the reciprocal space and col. 8 the energy cutoff of the plane wave expansion; CIF files containing the listed defect structures can be found in the supporting information and are named according to the "calc. no.".

| Calc. no. | defect                          | Relaxed part                                   | Cell Symmetry | # $e^-$ | $E_{\text{total}} / \text{eV}$ | # $k$ -points | $E_{\text{cut}} / \text{eV}$ |
|-----------|---------------------------------|------------------------------------------------|---------------|---------|--------------------------------|---------------|------------------------------|
| 0         | $\text{Al}_{\text{Zn}}^{(0)}$   | none                                           | $P3m1$        | 639     | -331.25552407                  | 4x4x4         | 500                          |
| 1         | $\text{Al}_{\text{Zn}}^{(1+)}$  | Al                                             | $P3m1$        | 638     | -334.16316930                  | 4x4x4         | 500                          |
| 2         | $\text{Al}_{\text{Zn}}^{(0)}$   | Al                                             | $P3m1$        | 639     | -331.26777987                  | 4x4x4         | 500                          |
| 3         | $\text{Al}_{\text{Zn}}^{(1-)}$  | Al                                             | $P3m1$        | 640     | -327.76446600                  | 4x4x4         | 500                          |
| 4         | $\text{Al}_{\text{Zn}}^{(1+)}$  | $\text{AlO}_4$                                 | $P3m1$        | 638     | -335.37212468                  | 4x4x4         | 500                          |
| 5         | $\text{Al}_{\text{Zn}}^{(0)}$   | $\text{AlO}_4$                                 | $P3m1$        | 639     | -332.45491438                  | 4x4x4         | 500                          |
| 6         | $\text{Al}_{\text{Zn}}^{(1-)}$  | $\text{AlO}_4$                                 | $P3m1$        | 640     | -328.93294249                  | 4x4x4         | 500                          |
| 7         | $\text{Al}_{\text{Zn}}^{(1+)}$  | $\text{AlO}_4\text{Zn}_{12}$                   | $P3m1$        | 638     | -335.40376669                  | 4x4x4         | 500                          |
| 8         | $\text{Al}_{\text{Zn}}^{(0)}$   | $\text{AlO}_4\text{Zn}_{12}$                   | $P3m1$        | 639     | -332.48360601                  | 4x4x4         | 500                          |
| 9         | $\text{Al}_{\text{Zn}}^{(1-)}$  | $\text{AlO}_4\text{Zn}_{12}$                   | $P3m1$        | 640     | -328.95911095                  | 4x4x4         | 500                          |
| 10        | $\text{Al}_{\text{Zn}}^{(1+)}$  | full                                           | $P3m1$        | 638     | -335.54170813                  | 4x4x4         | 500                          |
| 11        | $\text{Al}_{\text{Zn}}^{(0)}$   | full                                           | $P3m1$        | 639     | -332.61465545                  | 4x4x4         | 500                          |
| 12        | $\text{Al}_{\text{Zn}}^{(1-)}$  | full                                           | $P3m1$        | 640     | -329.08311640                  | 4x4x4         | 500                          |
| 13        | $\text{Al}_{\text{Zn}}^{(1+)}$  | Al                                             | $P1$          | 638     | -334.16317084                  | 4x4x4         | 500                          |
| 14        | $\text{Al}_{\text{Zn}}^{(0)}$   | Al                                             | $P1$          | 639     | -331.26778127                  | 4x4x4         | 500                          |
| 15        | $\text{Al}_{\text{Zn}}^{(1-)}$  | Al                                             | $P1$          | 640     | -327.76446759                  | 4x4x4         | 500                          |
| 16        | $\text{Al}_{\text{Zn}}^{(1+)}$  | $\text{AlO}_4$                                 | $P1$          | 638     | -335.37217452                  | 4x4x4         | 500                          |
| 17        | $\text{Al}_{\text{Zn}}^{(0)}$   | $\text{AlO}_4$                                 | $P1$          | 639     | -332.45496646                  | 4x4x4         | 500                          |
| 18        | $\text{Al}_{\text{Zn}}^{(1-)}$  | $\text{AlO}_4$                                 | $P1$          | 640     | -328.93299428                  | 4x4x4         | 500                          |
| 19        | $\text{Al}_{\text{Zn}}^{(1+)}$  | $\text{AlO}_4\text{Zn}_{12}$                   | $P1$          | 638     | -335.40386025                  | 4x4x4         | 500                          |
| 20        | $\text{Al}_{\text{Zn}}^{(0)}$   | $\text{AlO}_4\text{Zn}_{12}$                   | $P1$          | 639     | -332.48370112                  | 4x4x4         | 500                          |
| 21        | $\text{Al}_{\text{Zn}}^{(1-)}$  | $\text{AlO}_4\text{Zn}_{12}$                   | $P1$          | 640     | -328.95921854                  | 4x4x4         | 500                          |
| 22        | $\text{Al}_{\text{Zn}}^{(1+)}$  | full                                           | $P1$          | 638     | -335.54193373                  | 4x4x4         | 500                          |
| 23        | $\text{Al}_{\text{Zn}}^{(0)}$   | full                                           | $P1$          | 639     | -332.61488943                  | 4x4x4         | 500                          |
| 24        | $\text{Al}_{\text{Zn}}^{(1-)}$  | full                                           | $P1$          | 640     | -329.08332917                  | 4x4x4         | 500                          |
| 25        | $\text{Al}_{\text{i,Td}}^{(0)}$ | initial (see text)                             | $P3m1$        | 651     | -308.20341473                  | 4x4x4         | 500                          |
| 26        | $\text{Al}_{\text{i,Td}}^{(0)}$ | Al                                             | $P3m1$        | 651     | -318.39535382                  | 4x4x4         | 500                          |
| 27        | $\text{Al}_{\text{i,Td}}^{(0)}$ | $\text{Al}_{\text{i,Td}}\text{O}_4\text{Zn}_4$ | $P3m1$        | 651     | -324.80934174                  | 4x4x4         | 500                          |
| 28        | $\text{Al}_{\text{i,Oh}}^{(0)}$ | initial (see text)                             | $P3m1$        | 651     | -322.84030193                  | 4x4x4         | 500                          |
| 29        | $\text{Al}_{\text{i,Oh}}^{(0)}$ | Al                                             | $P3m1$        | 651     | -324.50176712                  | 4x4x4         | 500                          |

| Calc. no. | defect                                 | Relaxed part                                   | Cell Symmetry | # $e^-$ | $E_{\text{total}} / \text{eV}$ | # $k$ -points | $E_{\text{cut}} / \text{eV}$ |
|-----------|----------------------------------------|------------------------------------------------|---------------|---------|--------------------------------|---------------|------------------------------|
| 30        | $\text{Al}_{\text{i,Oh}}^{(0)}$        | $\text{Al}_{\text{i,Oh}}\text{O}_4\text{Zn}_4$ | $P3m1$        | 651     | -326.99241765                  | 4x4x4         | 500                          |
| 31        | none(ZnO)                              | 3x3x2 supercell                                | $P6_3mc$      | 648     | -326.76976112                  | 4x4x4         | 500                          |
| 32        | full, ZnO                              | 3x3x2 supercell                                | $P6_3mc$      | 648     | -326.89813177                  | 4x4x4         | 500                          |
| 33        | $\text{Al}_{\text{i,Oh}}V_{\text{Zn}}$ | Non opt                                        | $Pm$          | 639     | -322.80023658                  | 4x4x4         | 500                          |
| 34        | $\text{Al}_{\text{i,Oh}}V_{\text{Zn}}$ | Al-opt                                         | $Pm$          | 639     | -331.26778106                  | 4x4x4         | 500                          |
| 35        | $\text{Al}_{\text{i,Td}}V_{\text{Zn}}$ | Non opt                                        | $P3m1$        | 639     | -327.25049921                  | 4x4x4         | 500                          |
| 36        | $\text{Al}_{\text{i,Td}}V_{\text{Zn}}$ | Al-opt                                         | $P3m1$        | 639     | -331.26777979                  | 4x4x4         | 500                          |
| 37        | $\text{Al}_2V_{\text{Zn}} i)$          | Non opt                                        | $P1$          | 618     | -332.14337857                  | 4x4x4         | 500                          |
| 38        | $\text{Al}_2V_{\text{Zn}} i)$          | Al-opt                                         | $P1$          | 618     | -332.20270127                  | 4x4x4         | 500                          |
| 39        | $\text{Al}_2V_{\text{Zn}} i)$          | 1 <sup>st</sup> sphere opt                     | $P1$          | 618     | -335.00718144                  | 4x4x4         | 500                          |
| 40        | $\text{Al}_2V_{\text{Zn}} ii)$         | Non opt                                        | $P1$          | 618     | -332.11422101                  | 4x4x4         | 500                          |
| 41        | $\text{Al}_2V_{\text{Zn}} ii)$         | Al-opt                                         | $P1$          | 618     | -332.18848019                  | 4x4x4         | 500                          |
| 42        | $\text{Al}_2V_{\text{Zn}} ii)$         | 1 <sup>st</sup> sphere opt                     | $P1$          | 618     | -334.91637520                  | 4x4x4         | 500                          |
| 43        | $\text{Al}_2V_{\text{Zn}} iii)$        | Non opt                                        | $P1$          | 618     | -332.00894371                  | 4x4x4         | 500                          |
| 44        | $\text{Al}_2V_{\text{Zn}} iii)$        | Al-opt                                         | $P1$          | 618     | -332.15063989                  | 4x4x4         | 500                          |
| 45        | $\text{Al}_2V_{\text{Zn}} iii)$        | 1 <sup>st</sup> sphere opt                     | $P1$          | 618     | -334.72814086                  | 4x4x4         | 500                          |

### 6.1.1. The $\text{Al}_{\text{Zn}}$ defect site

The  $\text{Al}_{\text{Zn}}$  site is simulated by replacing one Zn atom by Al in the 3x3x2 supercell of ZnO. On PBE/PAW level the total energy per supercell amounts to -331.256 eV (calc. 0).

**Optimization of the  $\text{Al}_{\text{Zn}}$  position.** If only the  $\text{Al}_{\text{Zn}}$  position is optimized in space group symmetry  $P3m1$  (No 156), an energetic stabilization of -0.012 eV(=-1.2 kJ/mol) is observed (calc. 2, 639 $e^-$ ) in conjunction with a displacement in the range of 0.01 Å along the  $c$ -axis, that reduces the bond length differences between Al and its axial or non-axial O-atoms (see Table S2). The result is independent of the number of electrons (calculations have been performed with 638  $e^-$ , 639  $e^-$ , and 640  $e^-$ ). Allowing the same optimization in  $P1$  (No 1) results in practically the same structures; the displacement in the range of 0.001 Å relative to the symmetry-restricted  $\text{Al}_{\text{Zn}}$  optimization and an energy stabilization of 1.5 J/mol has more likely its origin in numerical issues rather than a true Jahn-Teller distortion.

**Table S2:** Comparison of structural parameters from optimizations of the Al<sub>Zn</sub> site, only. Al<sub>unrelaxed</sub> denotes the unrelaxed Al position.

| Calculation             | $d(\text{Al-Al}_{\text{unrelaxed}})/\text{\AA}$ | $d(\text{Al-O13}_{\text{ax}})/\text{\AA}$ | $d(\text{Al-O1})/\text{\AA}$ | $d(\text{Al-O10})/\text{\AA}$ | $d(\text{Al-O11})/\text{\AA}$ |
|-------------------------|-------------------------------------------------|-------------------------------------------|------------------------------|-------------------------------|-------------------------------|
| 0. unrelaxed            | 0,000                                           | 1,953                                     | 1,986                        | 1,986                         | 1,986                         |
| 1.(638 $e^-$ , $P3m1$ ) | 0,010                                           | 1,963                                     | 1,982                        | 1,982                         | 1,982                         |
| 2.(639 $e^-$ , $P3m1$ ) | 0,011                                           | 1,963                                     | 1,982                        | 1,982                         | 1,982                         |
| 3.(640 $e^-$ , $P3m1$ ) | 0,010                                           | 1,963                                     | 1,982                        | 1,982                         | 1,982                         |
| 13.(638 $e^-$ , $P1$ )  | 0,010                                           | 1,963                                     | 1,983                        | 1,982                         | 1,982                         |
| 14.(639 $e^-$ , $P1$ )  | 0,010                                           | 1,963                                     | 1,983                        | 1,982                         | 1,982                         |
| 15.(640 $e^-$ , $P1$ )  | 0,011                                           | 1,963                                     | 1,983                        | 1,982                         | 1,982                         |

**Optimization of Al<sub>Zn</sub>O<sub>4</sub>.** Optimization of the Al position together with its first coordination sphere, i.e. the four nearest neighbors  $O_i$ ,  $i=\{13, 1, 10, 11\}$ , results in a significant stabilization of 1.199 eV (=115.7 kJ/mol, calc. 5, 639  $e^-$ ) as compared to the unrelaxed structure. Selected structural parameters and comparisons to the unrelaxed structure are shown in Table S3. The Al position is hardly altered. The Al- $O_i$  distances are significantly shortened by 0.16 Å (O13) or 0.19 Å (O1,O10,O13). A shortening of the Al- $O_i$  distances is expected because of the smaller ionic radius of Al as compared to Zn. Furthermore, the difference  $|d(\text{Al-O13})-d(\text{Al-O1/10/13})|$  between the Al-O13 bond length along the  $c$ -axis and the other three Al-O bonds is significantly decreased from 0.033 Å in the unrelaxed structure to  $\leq 0.005$  Å in the VASP optimized one. Thus, the AlO<sub>4</sub> unit comes significantly closer to an ideal tetrahedron. The distances of  $O_i$  to their neighboring Zn atoms is increased by 0.09 Å to 2.044 Å (O13) and by {0.08, 0.06} Å to {2.035,2.051} Å for O1, O10, O11 (these atoms have two different O-Zn distances). Variation of the defect charge in the row of calcs. 4. to 6. (with 638 to 640  $e^-$ ) leads to very small, yet systematic, changes of atomic positions in the range  $\leq 0.005$  Å. The averaged Al-O distance decreases slightly with increasing number of  $e^-$ .

The same optimizations in space group  $P1$  (No 1) (calcs. 16-18) result in practically the same structures; with displacements in the range of 0.002 Å and an energy stabilization of 5 J/mol, which is no clear indication for a Jahn-Teller distortion.

**Table S3:** Comparison of structural parameters from optimizations of  $\text{Al}_{\text{Zn}}\text{O}_4$ .

| Calculation             | $d(X-X_{\text{unrelaxed}})/\text{\AA}$ |       |       |       |       | $d(\text{Al}-X)/\text{\AA}$ |       |       |       |
|-------------------------|----------------------------------------|-------|-------|-------|-------|-----------------------------|-------|-------|-------|
|                         | $X=\text{Al}$                          | O13   | O1    | O10   | O11   | O13 <sub>ax</sub>           | O1    | O10   | O11   |
| 0. unrelaxed            | 0,000                                  | 0,000 | 0,000 | 0,000 | 0,000 | 1,953                       | 1,986 | 1,986 | 1,986 |
| 4.(638 $e^-$ , $P3m1$ ) | 0,002                                  | 0,160 | 0,187 | 0,187 | 0,187 | 1,794                       | 1,799 | 1,799 | 1,799 |
| 5.(639 $e^-$ , $P3m1$ ) | 0,001                                  | 0,160 | 0,189 | 0,189 | 0,189 | 1,794                       | 1,797 | 1,797 | 1,797 |
| 6.(640 $e^-$ , $P3m1$ ) | 0,000                                  | 0,160 | 0,192 | 0,192 | 0,192 | 1,793                       | 1,795 | 1,795 | 1,795 |
| 16.(638 $e^-$ , $P1$ )  | 0,003                                  | 0,160 | 0,189 | 0,186 | 0,186 | 1,794                       | 1,799 | 1,799 | 1,799 |
| 17.(639 $e^-$ , $P1$ )  | 0,002                                  | 0,160 | 0,191 | 0,188 | 0,188 | 1,794                       | 1,797 | 1,797 | 1,797 |
| 18.(640 $e^-$ , $P1$ )  | 0,002                                  | 0,160 | 0,193 | 0,190 | 0,190 | 1,793                       | 1,795 | 1,795 | 1,795 |

**Optimization of  $\text{Al}_{\text{Zn}}\text{O}_4\text{Zn}_{12}$ .** The shorthand notation “ $\text{Al}_{\text{Zn}}\text{O}_4\text{Zn}_{12}$ ” indicates an optimization of the Al position together with its first (O*i*, see above) and second coordination sphere (Zn*j*,  $j=\{1, 2, 5, 9, 10, 11, 17, 18, 22, 24, 27, 28\}$ ). It results in an energetic stabilization of -118.5 kJ/mol (calc. 8, 639  $e^-$ ) compared to the unrelaxed structure, which is a gain of only 2.8 kJ/mol as compared to the optimization of  $\text{Al}_{\text{Zn}}\text{O}_4$ . Selected structural parameters of the first coordination sphere and comparisons to the unrelaxed structure are shown in Table S4. The difference  $|d(\text{Al}-\text{O13})-d(\text{Al}-\text{O1})|$  between the Al-O13 bond length along the *c*-axis and the other three Al-O bonds is <0.003 Å, i.e. further decreased as compared to  $\text{Al}_{\text{Zn}}\text{O}_4$ . Position changes in the second coordination sphere are about 0.018 Å for most Zn atoms, which is one order of magnitude smaller than those in the first coordination sphere. A bigger change of 0.042 Å is obtained for Zn28 (and the symmetry equivalent Zn11, Zn18), however. As in  $\text{Al}_{\text{Zn}}\text{O}_4$ , a very weak dependence on the defect charge is predicted, with slightly decreasing average Al-O distances going along with an increasing number of  $e^-$ .

The  $\text{Al}_{\text{Zn}}\text{O}_4\text{Zn}_{12}$  optimizations in space group *P1* (No 1) yield very similar structures; with displacements  $\leq 0.004$  Å and energy stabilizations of about 10 J/mol, which indicates that a very small Jahn-Teller distortion might be present. It is unlikely however, that this leads to a statically distorted structure at room temperature, because the different local minima on the potential energy surface should be thermally accessible.

**Table S4:** Comparison of structural parameters from optimizations of  $\text{Al}_{\text{Zn}}\text{O}_4\text{Zn}_{12}$ .

| Calculation         | $d(X-X_{\text{unrelaxed}})/\text{\AA}$ |       |       |       |       |       |       |       | $d(\text{Al}-X)/\text{\AA}$ |       |       |       |
|---------------------|----------------------------------------|-------|-------|-------|-------|-------|-------|-------|-----------------------------|-------|-------|-------|
|                     | $X=\text{Al}$                          | O13   | O1    | O10   | O11   | Zn2   | Zn9   | Zn28  | O13 <sub>ax</sub>           | O1    | O10   | O11   |
| 0. unrelaxed        | 0,000                                  | 0,000 | 0,000 | 0,000 | 0,000 | 0,000 | 0,000 | 0,000 | 1,953                       | 1,986 | 1,986 | 1,986 |
| 7.(638 $e^-$ )      | 0,023                                  | 0,175 | 0,175 | 0,175 | 0,175 | 0,015 | 0,019 | 0,042 | 1,800                       | 1,803 | 1,803 | 1,803 |
| 8.(639 $e^-$ )      | 0,021                                  | 0,175 | 0,179 | 0,179 | 0,179 | 0,016 | 0,019 | 0,037 | 1,799                       | 1,801 | 1,801 | 1,801 |
| 9.(640 $e^-$ )      | 0,018                                  | 0,174 | 0,183 | 0,183 | 0,183 | 0,018 | 0,020 | 0,033 | 1,797                       | 1,797 | 1,797 | 1,797 |
| 19.(638 $e^-$ , P1) | 0,023                                  | 0,175 | 0,178 | 0,174 | 0,174 | 0,015 | 0,019 | 0,041 | 1,800                       | 1,803 | 1,803 | 1,803 |
| 20.(639 $e^-$ , P1) | 0,021                                  | 0,175 | 0,181 | 0,177 | 0,177 | 0,016 | 0,019 | 0,037 | 1,798                       | 1,800 | 1,800 | 1,801 |
| 21.(640 $e^-$ , P1) | 0,018                                  | 0,173 | 0,187 | 0,181 | 0,181 | 0,018 | 0,020 | 0,032 | 1,797                       | 1,797 | 1,797 | 1,797 |

**Full optimization.** We denote the optimization of all 72 atomic sites in the  $3\times 3\times 2$  supercell as *full optimization* of  $\text{Al}_{\text{Zn}}\text{O}_{36}\text{Zn}_{35}$ . This optimization results in an energetic stabilization of -129.9 kJ/mol (calc. 11; 639  $e^-$ ) compared to the unrelaxed structure, i.e. further stabilization of -11.4 kJ/mol in comparison to  $\text{Al}_{\text{Zn}}\text{O}_4\text{Zn}_{12}$ . At first view, this seems larger than expected, because stabilization energies in the row  $\text{Al}_{\text{Zn}} \rightarrow \text{Al}_{\text{Zn}}\text{O}_4 \rightarrow \text{Al}_{\text{Zn}}\text{O}_4\text{Zn}_{12}$  decrease rapidly, which is in line with the picture of a local defect that induces the most significant structural changes of the bulk material in its vicinity. However, one has to consider, that in the full optimization not only the stress from the defective site is relaxed, but also the structural difference between the experimental and the calculated equilibrium structure of the ZnO-bulk, which amounts to -12.3 kJ/mol for the  $3\times 3\times 2$  supercell (calcs. 31+32)<sup>†</sup>. This indicates that changes outside the second coordination sphere of the dopant are probably below 1 kJ/mol. For an accurate measure one would require a larger supercell.

Selected structural parameters of the first coordination sphere and comparisons to the unrelaxed structure are shown in Table S5. Compared to the previous calculations the difference  $|d(\text{Al}-\text{O13})-d(\text{Al}-\text{O1})|$  between the Al-O13 bond length along the  $c$ -axis and the other three Al-O bonds is further decreased to  $\leq 0.002$  Å. Position changes in the second coordination sphere are  $\leq 0.02$  Å for all Zn atoms, which is one order of magnitude smaller than those in the first coordination sphere. As in the previous calculations, a weak decrease of the Al-O distances is obtained, if the number of  $e^-$  in the system is increased.

<sup>†</sup> Notably, significant changes in atomic distances are obtained for bulk ZnO when it is optimized at PBE/PAW level:  $d(\text{Zn}, \text{O13}_{\text{ax}})$  changes from 1.953 Å to 1.983 Å and  $d(\text{Zn}, \text{O1}_{\text{eq}})$  changes from 1.986 Å to 1.976 Å, i.e.  $d(\text{Zn}, \text{O13}_{\text{ax}}) > d(\text{Zn}, \text{O1}_{\text{eq}})$  after optimization. This result was checked to be independent of the choice of  $k$ -points and the  $\sigma$  (smearing) parameter.

Conduction of the full optimizations in space group  $P1$  (No 1) lead to very similar structures; with displacements  $\leq 0.004 \text{ \AA}$  and energy stabilizations  $< 23 \text{ J/mol}$ . which indicates that even if a small Jahn-Teller effect was present, the effective local symmetry for the  $^{27}\text{Al}$  NMR experiment would still have a  $C_3$  symmetry axis, because the thermal energy at room temperature is higher than the energetic stabilization by a factor of about 100.

**Table S5:** Comparison of structural parameters from full optimizations of  $\text{Al}_{\text{Zn}}\text{O}_{36}\text{Zn}_{35}$ .

| Calculation            | $d(X-X_{\text{unrelaxed}})/\text{\AA}$ |       |       |       |       |       |       |       | $d(\text{Al}-X)/\text{\AA}$ |       |       |       |
|------------------------|----------------------------------------|-------|-------|-------|-------|-------|-------|-------|-----------------------------|-------|-------|-------|
|                        | $X=\text{Al}$                          | O13   | O1    | O10   | O11   | Zn2   | Zn9   | Zn28  | O13 <sub>ax</sub>           | O1    | O10   | O11   |
| 0. unrelaxed           | 0,000                                  | 0,000 | 0,000 | 0,000 | 0,000 | 0,000 | 0,000 | 0,000 | 1,953                       | 1,986 | 1,986 | 1,986 |
| 10.(638 $e^-$ )        | 0,004                                  | 0,160 | 0,187 | 0,187 | 0,187 | 0,019 | 0,019 | 0,010 | 1,797                       | 1,799 | 1,799 | 1,799 |
| 11.(639 $e^-$ )        | 0,004                                  | 0,161 | 0,189 | 0,189 | 0,189 | 0,019 | 0,019 | 0,008 | 1,796                       | 1,797 | 1,797 | 1,797 |
| 12.(640 $e^-$ )        | 0,002                                  | 0,161 | 0,193 | 0,193 | 0,193 | 0,019 | 0,019 | 0,005 | 1,794                       | 1,794 | 1,794 | 1,794 |
| 22.(638 $e^-$ , $P1$ ) | 0,006                                  | 0,160 | 0,190 | 0,185 | 0,185 | 0,020 | 0,018 | 0,011 | 1,797                       | 1,799 | 1,799 | 1,799 |
| 23.(639 $e^-$ , $P1$ ) | 0,005                                  | 0,161 | 0,192 | 0,187 | 0,187 | 0,020 | 0,019 | 0,008 | 1,796                       | 1,797 | 1,797 | 1,797 |
| 24.(640 $e^-$ , $P1$ ) | 0,005                                  | 0,161 | 0,197 | 0,191 | 0,191 | 0,020 | 0,019 | 0,006 | 1,794                       | 1,794 | 1,794 | 1,794 |

In contrast to the previous Hartree-Fock based study by Maldonado and Stashans,<sup>15</sup> we find a local  $C_3$  pseudo-pointgroup symmetry of the  $\text{Al}_{\text{Zn}}$  site with the rotation axis along the crystal  $c$ -axis. The significant differences might indicate a flat potential for displacements of the atoms in the  $\text{AlO}_4$  unit. The calculated deviations from  $C_3$  symmetry are very small in our case and may be caused by numerical inaccuracies. In any way, the EFG anisotropy  $\eta_Q$  is predicted to be close to 0, no matter whether the  $\text{Al}_{\text{Zn}}$  site has precise  $C_3$  symmetry or only approximate. This is in agreement with the experimental findings. Deviations of the  $\text{AlO}_4$  unit from  $T_d$  symmetry are small, but clearly visible in the bond angles. Moreover, the atomic sites in the outer shells adapt more and more to the wurtzite type structure, so that we expect a small but not vanishing EFG ( $V_{zz}$ ). Figure S7(a) shows the local  $\text{Al}_{\text{Zn}}$  structure of calc. 20, which is representative of all calculations performed under periodic boundary conditions.

**Table S6:** Comparison of bond angles from all optimizations performed on Al<sub>Zn</sub>.

| Calculation                                                            | Bond angles $\angle(i-j-k)/\text{deg}$ |            |            |           |           |            |
|------------------------------------------------------------------------|----------------------------------------|------------|------------|-----------|-----------|------------|
|                                                                        | O13-Al-O1                              | O13-Al-O10 | O13-Al-O11 | O1-Al-O10 | O1-Al-O11 | O10-Al-O11 |
| 0. unrelaxed                                                           | 109,13                                 | 109,13     | 109,13     | 109,81    | 109,81    | 109,81     |
| 1.(638 $e^-$ , Al)                                                     | 108,85                                 | 108,85     | 108,85     | 110,09    | 110,09    | 110,09     |
| 2.(639 $e^-$ , Al)                                                     | 108,84                                 | 108,84     | 108,84     | 110,10    | 110,10    | 110,10     |
| 3.(640 $e^-$ , Al)                                                     | 108,85                                 | 108,85     | 108,85     | 110,09    | 110,09    | 110,09     |
| 4.(638 $e^-$ , Al <sub>Zn</sub> O <sub>4</sub> )                       | 108,64                                 | 108,64     | 108,64     | 110,29    | 110,29    | 110,29     |
| 5.(639 $e^-$ , Al <sub>Zn</sub> O <sub>4</sub> )                       | 108,63                                 | 108,63     | 108,63     | 110,30    | 110,30    | 110,30     |
| 6.(640 $e^-$ , Al <sub>Zn</sub> O <sub>4</sub> )                       | 108,63                                 | 108,63     | 108,63     | 110,30    | 110,30    | 110,30     |
| 7.(638 $e^-$ , Al <sub>Zn</sub> O <sub>4</sub> Zn <sub>12</sub> )      | 108,60                                 | 108,60     | 108,60     | 110,32    | 110,32    | 110,32     |
| 8.(639 $e^-$ , Al <sub>Zn</sub> O <sub>4</sub> Zn <sub>12</sub> )      | 108,61                                 | 108,61     | 108,61     | 110,32    | 110,32    | 110,32     |
| 9.(640 $e^-$ , Al <sub>Zn</sub> O <sub>4</sub> Zn <sub>12</sub> )      | 108,64                                 | 108,64     | 108,64     | 110,29    | 110,29    | 110,29     |
| 10.(638 $e^-$ , full opt)                                              | 108,32                                 | 108,32     | 108,32     | 110,59    | 110,59    | 110,59     |
| 11.(639 $e^-$ , full opt )                                             | 108,33                                 | 108,33     | 108,33     | 110,59    | 110,59    | 110,59     |
| 12.(640 $e^-$ , full opt)                                              | 108,38                                 | 108,38     | 108,38     | 110,54    | 110,54    | 110,54     |
| 13.(638 $e^-$ , Al <sub>Zn</sub> , P1)                                 | 108,84                                 | 108,86     | 108,86     | 110,07    | 110,08    | 110,10     |
| 14.(639 $e^-$ , Al <sub>Zn2</sub> , P1)                                | 108,83                                 | 108,85     | 108,86     | 110,08    | 110,08    | 110,10     |
| 15.(640 $e^-$ , Al <sub>Zn</sub> , P1)                                 | 108,82                                 | 108,86     | 108,85     | 110,08    | 110,07    | 110,11     |
| 16.(638 $e^-$ , Al <sub>Zn</sub> O <sub>4</sub> , P1)                  | 108,57                                 | 108,67     | 108,67     | 110,29    | 110,29    | 110,29     |
| 17.(639 $e^-$ , Al <sub>Zn</sub> O <sub>4</sub> , P1)                  | 108,57                                 | 108,67     | 108,67     | 110,30    | 110,30    | 110,29     |
| 18.(640 $e^-$ , Al <sub>Zn</sub> O <sub>4</sub> , P1)                  | 108,57                                 | 108,66     | 108,60     | 110,30    | 110,31    | 110,29     |
| 19.(638 $e^-$ , Al <sub>Zn</sub> O <sub>4</sub> Zn <sub>12</sub> , P1) | 108,58                                 | 108,60     | 108,60     | 110,31    | 110,31    | 110,40     |
| 20.(639 $e^-$ , Al <sub>Zn</sub> O <sub>4</sub> Zn <sub>12</sub> , P1) | 108,58                                 | 108,61     | 108,61     | 110,30    | 110,30    | 110,38     |
| 21.(640 $e^-$ , Al <sub>Zn</sub> O <sub>4</sub> Zn <sub>12</sub> , P1) | 108,59                                 | 108,67     | 108,67     | 110,25    | 110,25    | 110,36     |
| 22.(638 $e^-$ , full opt, P1)                                          | 108,20                                 | 108,40     | 108,40     | 110,59    | 110,59    | 110,57     |
| 23.(639 $e^-$ , full opt, P1)                                          | 108,24                                 | 108,40     | 108,40     | 110,58    | 110,58    | 110,56     |
| 24.(640 $e^-$ , full opt, P1)                                          | 108,26                                 | 108,46     | 108,46     | 110,52    | 110,51    | 110,55     |

### 6.1.2. The Al<sub>i,Td</sub> interstitial site

The Al<sub>i,Td</sub> interstitial site is located on an axis parallel to the crystal *c*-axis that connects a Zn atom and its shortest distant O neighbor. Initially, the Al atom was placed at the tetrahedral void of that O-site at a distance of 1.953 Å and opposite to the Zn atom. This implied a distance of 1.986 Å to three other O-sites, so that the Al<sub>i,Td</sub> interstitial had an approximately tetrahedral environment of nearest oxygen

neighbors, similar as the Zn site in undoped ZnO. In addition, there is a short Al-Zn contact present with a distance of 1.302 Å and three further Zn-sites at a distance of 2.283 Å. The total energy per  $\text{Al}_{i,Td}\text{Zn}_{36}\text{O}_{36}$  supercell (3x3x2) amounts to -308.203 eV (calc. 25). All results shown in this section were calculated with  $651e^-$ , i.e. a formal doping with an uncharged  $\text{Al}^0(=\text{Al}_{i,Td} + 3 e^-)$  and assumption of space group symmetry  $P3m1$  (No. 156).

**Optimization of  $\text{Al}_{i,Td}$ .** Relaxation of the  $\text{Al}_{i,Td}$ -site only (calc. 26) results in an energetic stabilization of -10.192 eV(=-983.4 kJ/mol) and shows a significant displacement of 0.438 Å parallel to -c which increases the short distance to the Zn site mentioned above to 1.740 Å, while the distance to the O-site is reduced to 1.514 Å.

**Optimization of  $\text{Al}_{i,Td}\text{O}_4\text{Zn}_4$ .** The relaxation of the Al position together with its 8 nearest neighbors (four O-, four Zn-sites)<sup>†</sup> (calc. 27) is denoted as  $\text{Al}_{i,Td}\text{O}_4\text{Zn}_4$ . The structure is stabilized by -16.606 eV(=-1602.2 kJ/mol) as compared to the non-relaxed structure (see Figure S7). At this Al changes its position by 0.419 Å along -c, the distance to the nearest (axial) O-site amounts to 1.643 Å, the distance to the other O-atoms reduces to 1.860 Å; the distance to the shortest Zn increases to 2.029 Å, the one to the other three Zn-sites mentioned above increases to 2.434 Å. A comparison of structural parameters is given in Table S7. Figure S7b shows the final structure of the  $\text{Al}_{i,Td}$  defect obtained by calc. 27.

**Table S7:** Comparison of structural parameters from different optimizations of  $\text{Al}_{i,Td}$  in a 3x3x2 supercell.

| Calculation                                 | $d(X-X_{\text{unrelaxed}})/\text{\AA}$ |       |           |       |               | $d(\text{Al}-X)/\text{\AA}$ |       |       |       |
|---------------------------------------------|----------------------------------------|-------|-----------|-------|---------------|-----------------------------|-------|-------|-------|
|                                             | $X=\text{Al}$                          | O29   | O4,O5,O13 | Zn35  | Zn8,Zn29,Zn36 | O29                         | O4    | Zn35  | Zn8   |
| 25. unrelaxed                               | 0,000                                  | 0,000 | 0,000     | 0,000 | 0,000         | 1.953                       | 1.986 | 1.302 | 2.283 |
| 26. $\text{Al}_{i,Td}$                      | 0.439                                  | 0.000 | 0.000     | 0.000 | 0.000         | 1.514                       | 2.169 | 1.740 | 2.065 |
| 27. $\text{Al}_{i,Td}\text{O}_4\text{Zn}_4$ | 0.419                                  | 0.110 | 0.307     | 0.308 | 0.363         | 1.643                       | 1.860 | 2.029 | 2.434 |

### 6.1.3. Optimization of the $\text{Al}_{i,Oh}$ interstitial site

The  $\text{Al}_{i,Oh}$  interstitial site is located in the channels of the wurtzite structure that are visible when the structure is viewed along the crystal c-axis. Initially, the Al-atom was the placed at that point where it is

<sup>†</sup> These neighbors may be shortly termed 1<sup>st</sup> and 2<sup>nd</sup> coordination sphere of  $\text{Al}_{i,Oh}$ .

surrounded by six O-atoms at a distance of 2.283 Å in a perfectly octahedral fashion. It should be mentioned, however, that there are three shorter ionic contacts to Zn with a distance of 1.866 Å as well as three somewhat longer ones at a distance of 2.708 Å in this structure as well. All results shown in this section were calculated with 651  $e^-$ , i.e. a formal doping of an uncharged  $\text{Al}^0(=\text{Al}_{i,Oh} + 3 e^-)$ , and imposed  $P3m1$ . The total energy per unit cell amounts to -322.840 eV (calc. 28), which is -14.637 eV (= -1412.2 kJ/mol) more stable than the (unrelaxed)  $\text{Al}_{i,Td}$  interstitial site.

**Optimization of  $\text{Al}_{i,Oh}$ .** Relaxation of the  $\text{Al}_{i,Oh}$ -site only (calc. 29) results in an energetic stabilization by -1.661 eV (= -160.3 kJ/mol) and shows a significant displacement of 0.647 Å parallel to + $c$  that increases the short distances Zn sites mentioned above to 2.281 Å, while the distance to three of the O-sites is reduced to 1.987 Å.

**Optimization of  $\text{Al}_{i,Oh}\text{O}_4\text{Zn}_4$ .** After relaxation of the Al position together with the 12 nearest neighbors mentioned above<sup>†</sup> (calc. 30) the structure is stabilized by -4.152 eV (= -400.6 kJ/mol) as compared to the non-relaxed structure (see Figure S7c). At this Al changes its position by 0.620 Å along + $c$ , three of the six distances to O-atoms reduce to 1.815 Å, while the other three increase to 2.684 Å; the three shortest Zn distances mentioned above increase to 2.468 Å and the other three mentioned above reduce to 2.525 Å. A comparison of structural parameters is given in Table S8.

**Table S8:** Comparison of structural parameters from different optimizations of  $\text{Al}_{i,Oh}$  in a 3x3x2 supercell.

| Calculation     | $d(X-X_{\text{unrelaxed}})/\text{Å}$ |            |            |               |                | $d(\text{Al}-X)/\text{Å}$ |       |       |       |
|-----------------|--------------------------------------|------------|------------|---------------|----------------|---------------------------|-------|-------|-------|
|                 | $X=\text{Al}$                        | O2,O23,O24 | O3,O16,O19 | Zn4,Zn32,Zn36 | Zn19,Zn21,Zn35 | O2                        | O3    | Zn4   | Zn19  |
| 28. unrelaxed   | 0,000                                | 0,000      | 0,000      | 0,000         | 0,000          | 2.283                     | 2.283 | 2.708 | 1,986 |
| 29.(651 $e^-$ ) | 0.647                                | 0.000      | 0.000      | 0.000         | 0.000          | 1.987                     | 2.705 | 2.286 | 2.281 |
| 30.(651 $e^-$ ) | 0.620                                | 0.182      | 0.034      | 0.224         | 0.254          | 1.815                     | 2.684 | 2.525 | 2.468 |

#### 6.1.4. Optimization of the $[\text{Al}_2V_{\text{Zn}}]$ defect site

The hypothetical  $[\text{Al}_2V_{\text{Zn}}]$  defect may occur three different configurations (see Figure S5), because the ligands of O in undoped ZnO form an imperfect tetrahedron with  $C_{3v}$  symmetry (the atomic distance to the ligand aligned along the crystal  $c$ -axis is shorter).

<sup>†</sup> These neighbors may be shortly termed 1<sup>st</sup> and 2<sup>nd</sup> coordination sphere of  $\text{Al}_{i,Oh}$ .

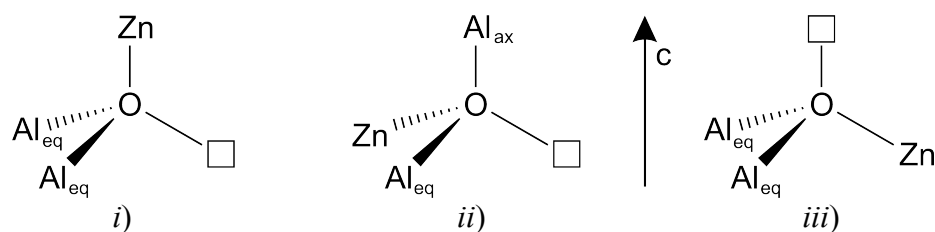

**Figure S6:** Three possible configurations of the (unrelaxed)  $[Al_2V_{Zn}]$  defect. The empty squares denote a void. Indices ax (for axial) and eq (equatorial) refer to the orientation relative to the c-axis. Configuration *ii*) can be realized in two enantiomorphs, which possess the same  $^{27}Al$  NMR properties, however.

All three possibilities were subject to a partial structure optimization (in a  $3 \times 3 \times 2$  supercell) including the central oxygen, the Al-sites and the O-sites in the first coordination sphere around Al and the void. The optimized structures are shown in Figure S7(d-e), respectively. All results shown in this section were calculated with  $618e^-$ , i.e. a formal doping of two uncharged  $Al^0$ , or  $Al_{Zn}^{\bullet} + 1e^-$ . For the unrelaxed  $[Al_2V_{Zn}]$  *i*) defect the total energy per unit cell amounts to -332.143 eV (calc. 40). Upon optimization the structure stabilizes by -2.864 eV (= -276.3 kJ/mol). The relaxed  $[Al_2V_{Zn}]$  *i*) defect is the most stable one, the relaxed  $[Al_2V_{Zn}]$  defects *ii*) and *iii*) are less stable by 0.091 eV (= 8.8 kJ/mol) and 0.279 eV (= 26.9 kJ/mol), respectively.

A few structural parameters of the  $[Al_2V_{Zn}]$  defects are summarized in Table S9. The structural relaxation can be understood qualitatively from an electrostatic viewpoint, if the crystal is thought to be composed of positively charged Al and Zn atoms and negatively charged O atoms, as well as from a bond theoretical viewpoint. The oxygen ligands around the Al move towards the Al-sites, because Al has a higher core charge ( $Al^{3+}$ ) and more compact valence orbitals than Zn. The oxygen neighbors next to the void lack an attractive force in the direction of the void, hence they move away from it. The central oxygen atom of the  $[Al_2V_{Zn}]$  defect shown in Figure S6 experiences both effects simultaneously and shows therefor the largest relaxation displacement.

**Table S9:** Structural parameters of relaxed  $[\text{Al}_2V_{\text{Zn}}]$  defects obtained in a  $3 \times 3 \times 2$  supercell.

| Calculation                           | $d(X-X_{\text{unrelaxed}})/\text{\AA}$ |                 |                 | $d(\text{Al}_a-X)/\text{\AA}$ |                |                |                | $d(\text{Al}_b-X)/\text{\AA}$ |                |                |                |
|---------------------------------------|----------------------------------------|-----------------|-----------------|-------------------------------|----------------|----------------|----------------|-------------------------------|----------------|----------------|----------------|
|                                       | O <sub>c</sub>                         | Al <sub>a</sub> | Al <sub>b</sub> | O <sub>d</sub>                | O <sub>e</sub> | O <sub>f</sub> | O <sub>g</sub> | O <sub>d</sub>                | O <sub>e</sub> | O <sub>f</sub> | O <sub>g</sub> |
| 37. $[\text{Al}_2V_{\text{Zn}}]$ i)   | 0.315                                  | 0.057           | 0.057           | 1.783                         | 1.798          | 1.801          | 1.814          | 1.783                         | 1.798          | 1.801          | 1.814          |
| 40. $[\text{Al}_2V_{\text{Zn}}]$ ii)  | 0.322                                  | 0.074           | 0.095           | 1.758                         | 1.786          | 1.798          | 1.857          | 1.725                         | 1.779          | 1.824          | 1.893          |
| 43. $[\text{Al}_2V_{\text{Zn}}]$ iii) | 0.348                                  | 0.049           | 0.049           | 1.785                         | 1.801          | 1.812          | 1.818          | 1.785                         | 1.801          | 1.812          | 1.818          |

O<sub>c</sub> is the central oxygen (see Fig. S6), Al<sub>a</sub> is always equatorial. O<sub>d</sub>, O<sub>e</sub>, O<sub>f</sub>, O<sub>g</sub> are sorted according to increased distance from Al<sub>a</sub> or Al<sub>b</sub>, respectively.

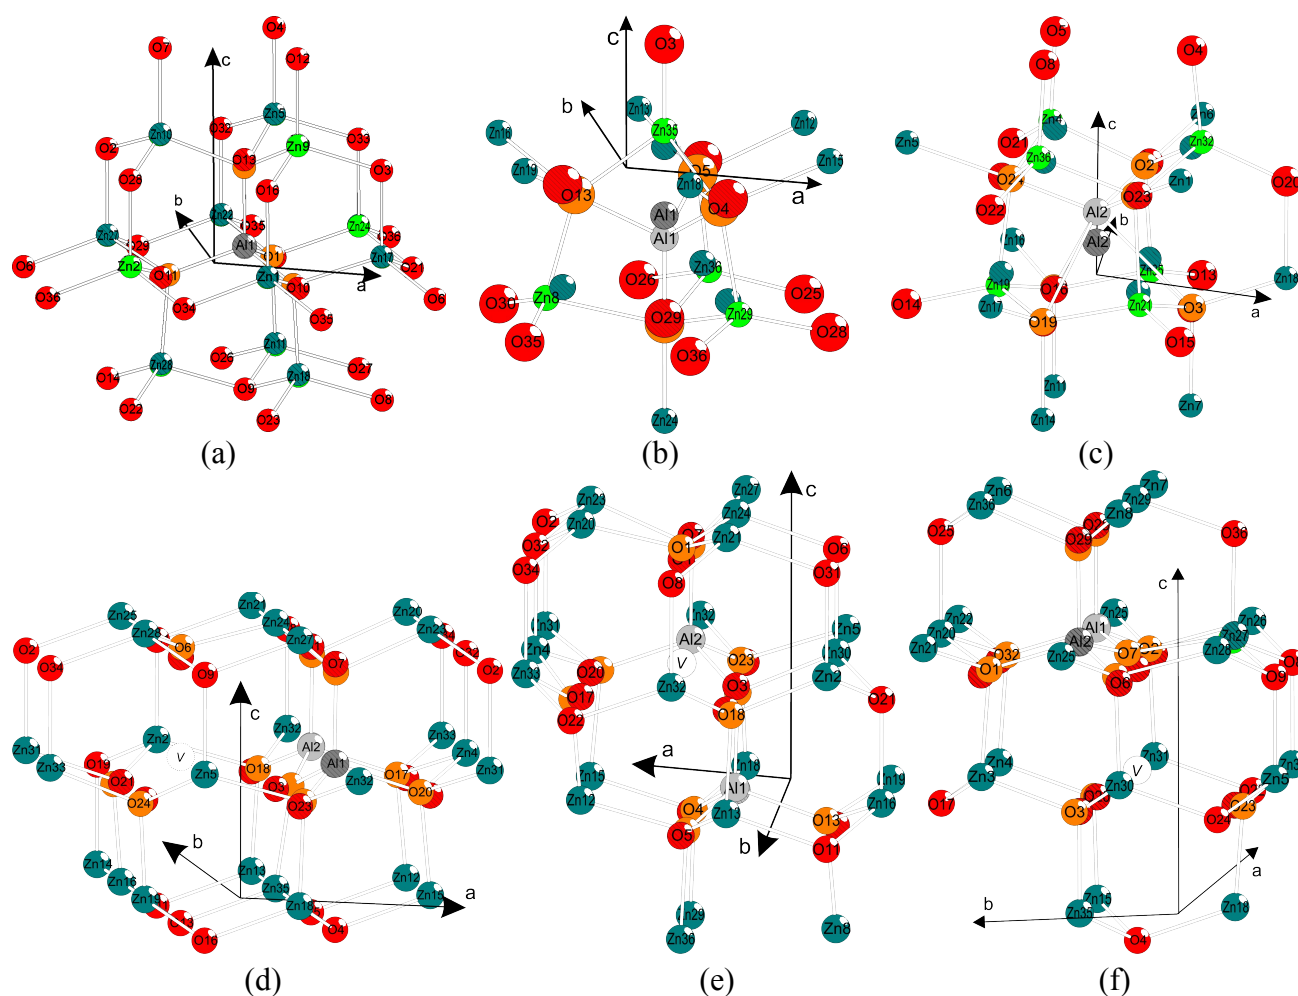

**Figure S7:** Comparison of non-optimized and relaxed structures of various defect sites in ZnO:Al (larger cutout than in mein article). (a)  $\text{Al}_{\text{Zn}}$ , (b)  $\text{Al}_{\text{iTd}}$ , (c)  $\text{Al}_{\text{iOh-}}$ , (d)  $[\text{Al}_2\text{V}_{\text{Zn}}]$ , config. *i*), (e)  $[\text{Al}_2\text{V}_{\text{Zn}}]$ , config. *ii*), (f)  $[\text{Al}_2\text{V}_{\text{Zn}}]$ , config. *iii*). Oxygen sites are drawn in orange if relaxed or red if unrelaxed, zinc-sites in light green (relaxed) or dark green (unrelaxed), aluminium sites in light grey (relaxed) or dark grey (unrelaxed). Non-optimized sites corresponding to optimized ones are hatched, voids are indicated by empty circles. Sites belonging to structures (a-c) are optimized up to second coordination sphere with respect to the point defects, structures (d-f) up to first sphere (see text for details).

## 6.2. Calculation of $^{27}\text{Al}$ NMR parameters by EEIM

In the present work we show that the EEIM is also suitable for the calculation of electric field gradients (EFGs) in case of crystalline and doped crystalline materials. For doped crystals a two-step procedure

(analogous to the one for  $\sigma$  in ref. <sup>6</sup> is proposed:

In the first step, the embedding point charges are obtained for an ideal (i.e. non-defective) crystal/quantum cluster (QC), where the usual self-consistent procedure of EEIM as described in ref. <sup>7</sup> is employed. From the ZnO crystal<sup>3</sup> we created a roughly spherical  $[\text{Zn}_{39}\text{O}_{39}]$ -QC shown in Figure S8(a) as a cutout with an embedding in 56370 point charges. Details on QC construction are given in Table S10. The optimized atomic charges for Zn and O are  $\pm 1.60734 \cdot e$ , respectively.

In the second step, the QC is modified to contain the (relaxed) substitutional  $\text{Al}_{\text{Zn}}$  defect close to its center, as well as an outer region in which the atomic sites of the ideal crystal are left unperturbed, i.e. the defects and the corresponding relaxations are not periodically repeated. As the charge  $q_{\text{QC}}$  of the modified QC cannot be determined exactly, it is set to a value that allows a closed shell calculation and, at the same time, is close to the sum of the expected fragment charge according to the self-consistent charges determined in the first step and the assumed defect site charge. Formal charges can be used for lowly charged defect sites, since the EEIM seems to tolerate small charge misfits of the QC.<sup>6</sup> For  $\text{Al}_{\text{Zn}}$  we created two QCs,  $[\text{AlZn}_{38}\text{O}_{39}]^+$  and  $[\text{AlZn}_{38}\text{O}_{39}]^-$  (corresponding to  $\text{Al}_{\text{Zn}}^+$  and  $\text{Al}_{\text{Zn}}^-$ , respectively,) which are embedded in the charge field obtained from  $[\text{Zn}_{39}\text{O}_{39}]$  in the first step.  $\text{Al}_{i,\text{Td}}$  was calculated analogously in a neutral  $[\text{AlZn}_{38}\text{O}_{38}]$  QC,  $\text{Al}_{i,\text{Oh}}$  in a  $[\text{AlZn}_{42}\text{O}_{42}]$  QCs, and the  $\text{Al}_2\text{V}_{\text{Zn}}$  defects in  $[\text{Al}_2\text{Zn}_{46}\text{O}_{49}]$  QCs. Further details are given in Table S10. Finally, the calculation of EFG and NMR parameters is performed.

A locally dense AO basis of gaussian functions was defined by setting up three spherical regions with radial ranges  $r_i$  ( $i=1,2,3$ ) around the substitution site. In the inner region ( $r_1=[0,4[\text{\AA}$  for  $\text{Al}_{\text{Zn}}$ ) the 6-311G(3df,3pd) bases<sup>8,9</sup> for O and Al and the 6-31G\* (all electron) atomic basis set for Zn<sup>10</sup> were used. For selected calculations (46,47,59) we checked the basis set convergence of the EFG by using various other basis sets on the Al site, i.e. 6-31G\*<sup>9</sup>, pcS-3<sup>11</sup> and pcS-3 with decontracted core orbitals. In the second region ( $r_2=[4,5[\text{\AA}$  for  $\text{Al}_{\text{Zn}}$ ) the 6-31G\* basis set was used for O, and the CEP-4G set for Zn<sup>12</sup> with corresponding pseudo potentials for the core electrons. CEP-4G sets with pseudo potentials were used in the outer region ( $r_3 \geq 5\text{\AA}$  for  $\text{Al}_{\text{Zn}}$ ) for the remaining atoms. The same AO bases with slightly different radial ranges  $r_i$  were used for the other defects (see Table S10), except for  $\text{Al}_{i,\text{Td}}$  where an Ahlrichs-VTZ basis<sup>13</sup> was used for the nearest Zn atoms. Tight convergence criteria were chosen, corresponding to maximum deviations in density matrix elements of  $10^{-8}$  and in the energy of  $10^{-8}$  Hartree. Quadrature was performed on an ultra fine grid, i.e. a grid of 99 radial shells and 590

angular points per shell on each atom. For some calculations using the (decontracted) pcS-3 basis set, a number of 159 radial shells was required to reach convergence. Only restricted wave functions were allowed. The derivatives required for the computation of the  $^{27}\text{Al}$  EFG tensors  $q$  were calculated analytically using the aforementioned model/basis set combination. Absolute nuclear magnetic shielding tensors  $\sigma$  were calculated using the GIAO formalism.<sup>14</sup> The derivation of a conversion equation from absolute magnetic shieldings  $\sigma$  ( $^{27}\text{Al}$ ) to chemical shift values  $\delta$  ( $^{27}\text{Al}$ ) is hampered by the fact that the currently used  $^{27}\text{Al}$  chemical shift reference is essentially hydrated  $\text{Al}^{3+}$  ions (the reference compound is a solution of  $\text{Al}(\text{NO}_3)_3$  1.1 mol  $\text{kg}^{-1}$  in  $\text{D}_2\text{O}$ )<sup>15</sup> whose dynamical behavior makes a quantum chemical modeling difficult. Instead, we used solid  $\alpha\text{-Al}_2\text{O}_3$  as a secondary reference, whose crystal structure at 300 K was published by Ishizawa *et al.*<sup>16</sup> (ICSD 10425) and whose experimental isotropic chemical shift has been determined to  $\delta_{\text{iso}}^{\text{exp}}=18.8$  ppm by Vosegaard and Jakobsen<sup>17</sup> and to 16.0 ppm by Skibsted *et al.*<sup>18</sup>. We used the first value in the conversion equation 1 for a given sample  $s$ .

$$\delta^{\text{calc}}(s) = \sigma_{\text{iso}}^{\text{calc}}(\alpha\text{-Al}_2\text{O}_3) - \sigma^{\text{calc}}(s) - \delta_{\text{iso}}^{\text{exp}}(\alpha\text{-Al}_2\text{O}_3) \quad (1)$$

$\sigma_{\text{iso}}^{\text{calc}}(\alpha\text{-Al}_2\text{O}_3)$  is calculated with the same quantum chemical model and basis functions as  $\sigma^{\text{calc}}(s)$ , as far as possible, to cancel out systematic basis set errors. An EEIM procedure using  $[\text{Al}_{14}\text{O}_{21}]$ -QCs in 77725 embedding charges resulted in  $\sigma_{\text{iso}}^{\text{calc}}(\alpha\text{-Al}_2\text{O}_3)=578.68$  ppm for 6-31G\*, 557.78 ppm for 6-311G(3df,3pd), 555.98 ppm for pcS-3 and 555.66 ppm for uncontracted pcS-3. Details are shown in Table S10. The similarity between 6-311G(3df,3pd) and (uncontracted) pcS-3 shieldings indicates that the basis expansion is sufficiently converged.

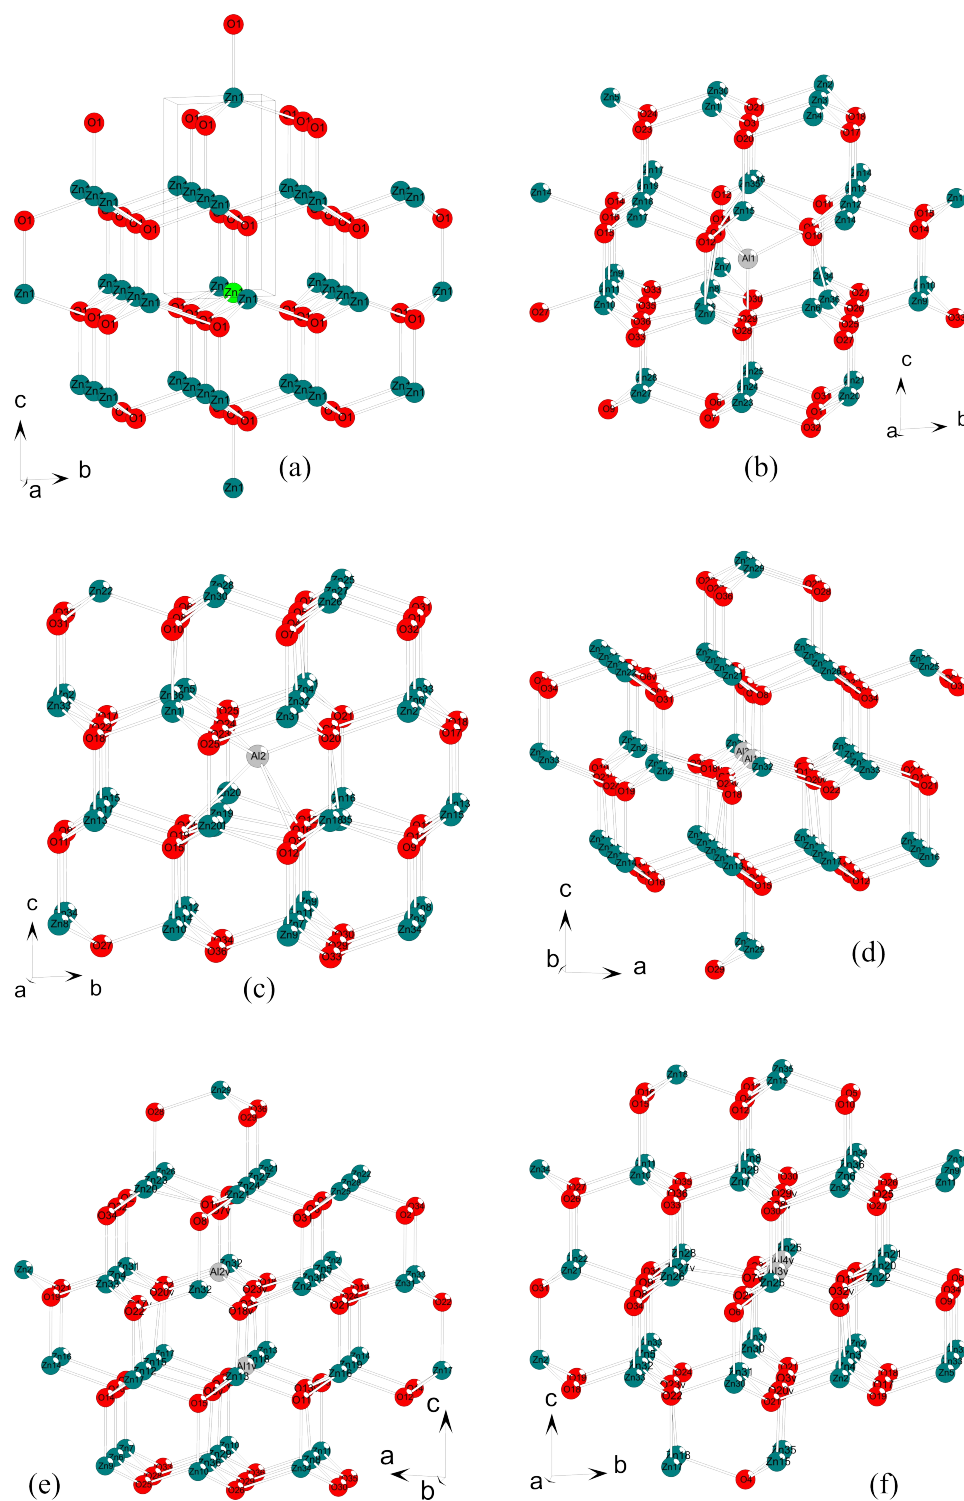

**Figure S8:** Quantum clusters used in EEIM calculations. (a) used for determination of embedding charges and for  $\text{Al}_{\text{Zn}}$  (defect substitutes highlighted Zn, calcs. 46-53); (b) used for  $\text{Al}_{i,Td}$  (calc. 54); (c) used for  $\text{Al}_{i,Oh}$  (calc. 55); (d) used for  $[\text{Al}_2\text{V}_{\text{Zn}}]i$  (calc. 56); (e) used for  $[\text{Al}_2\text{V}_{\text{Zn}}]ii$  (calc. 57); (f) used for  $[\text{Al}_2\text{V}_{\text{Zn}}]iii$  (calc. 58).

**Table S10:** Setup of EEIM cluster calculations at mPW1PW level for defect structures from VASP optimized structures

| calc. no. | defect                                        | struct. opt. no <sup>a</sup> | QC                                                               | basis                                                                 | atom                       | range/Å <sup>b</sup>                                                                  | $N_a, N_b, N_c$<br><sub>c</sub> | $[N_1+N_2]$<br><sub>c</sub> | $N_{rep}$ <sup>c</sup> |
|-----------|-----------------------------------------------|------------------------------|------------------------------------------------------------------|-----------------------------------------------------------------------|----------------------------|---------------------------------------------------------------------------------------|---------------------------------|-----------------------------|------------------------|
| 46        | Al <sub>Zn</sub>                              | 0                            | [AlZn <sub>38</sub> O <sub>39</sub> ] <sup>-</sup>               | 6-311G(3df)<br>6-31G(d)<br>6-31G(d)<br>CEP-4G<br>CEP-4G               | Al,O<br>Zn<br>O<br>Zn<br>O | $r_s < 4.0$<br>$r_s < 4.0$<br>$r_s \in [4,5[$<br>$r_s \geq 4.0$<br>$r_s \geq 5.0$     | 5, 5, 5                         | 600                         | 2000                   |
| 47        | Al <sub>Zn</sub>                              | 0                            | [AlZn <sub>38</sub> O <sub>39</sub> ] <sup>+</sup>               | same as in calc. 46                                                   |                            |                                                                                       | 5, 5, 5                         | 600                         | 2000                   |
| 48        | Al <sub>Zn</sub>                              | 7                            | [AlZn <sub>38</sub> O <sub>39</sub> ] <sup>-</sup>               | same as in calc. 46                                                   |                            |                                                                                       | 6, 6, 6                         | 600                         | 2300                   |
| 49        | Al <sub>Zn</sub>                              | 7                            | [AlZn <sub>38</sub> O <sub>39</sub> ] <sup>+</sup>               | same as in calc. 46                                                   |                            |                                                                                       | 6, 6, 6                         | 600                         | 2300                   |
| 50        | Al <sub>Zn</sub>                              | 8                            | [AlZn <sub>38</sub> O <sub>39</sub> ] <sup>-</sup>               | same as in calc. 46                                                   |                            |                                                                                       | 6, 6, 6                         | 600                         | 2300                   |
| 51        | Al <sub>Zn</sub>                              | 8                            | [AlZn <sub>38</sub> O <sub>39</sub> ] <sup>+</sup>               | same as in calc. 46                                                   |                            |                                                                                       | 6, 6, 6                         | 600                         | 2300                   |
| 52        | Al <sub>Zn</sub>                              | 9                            | [AlZn <sub>38</sub> O <sub>39</sub> ] <sup>-</sup>               | same as in calc. 46                                                   |                            |                                                                                       | 6, 6, 6                         | 600                         | 2300                   |
| 53        | Al <sub>Zn</sub>                              | 9                            | [AlZn <sub>38</sub> O <sub>39</sub> ] <sup>+</sup>               | same as in calc. 46                                                   |                            |                                                                                       | 6, 6, 6                         | 600                         | 2300                   |
| 54        | Al <sub><i>i,Td</i></sub>                     | 27                           | [AlZn <sub>38</sub> O <sub>38</sub> ] <sup>+</sup>               | 6-311G(3df)<br>Ahlr.-VTZ <sup>d</sup><br>6-31G(d)<br>CEP-4G<br>CEP-4G | Al,O<br>Zn<br>O<br>Zn<br>O | $r_s < 3.7$<br>$r_s < 3.6$<br>$r_s \in [3.7,4.8[$<br>$r_s \geq 4.0$<br>$r_s \geq 5.0$ | 6, 6, 6                         | 600                         | 2300                   |
| 55        | Al <sub><i>i,Oh</i></sub>                     | 30                           | [AlZn <sub>42</sub> O <sub>42</sub> ] <sup>+</sup>               | 6-311G(3df)<br>Ahlr.-VTZ <sup>d</sup><br>6-31G(d)<br>CEP-4G           | Al,O<br>Zn<br>O,Zn<br>O,Zn | $r_s < 3.7$<br>$r_s < 3.7$<br>$r_s \in [3.7,4.3[$<br>$r_s \geq 4.3$                   | 6, 6, 6                         | 600                         | 2300                   |
| 56        | [Al <sub>2</sub> V <sub>Zn</sub> ] <i>i</i>   | 39                           | [Al <sub>2</sub> Zn <sub>46</sub> O <sub>49</sub> ] <sup>0</sup> | 6-311G(3df)<br>6-31G(d)<br>6-31G(d)<br>CEP-4G                         | Al,O<br>Zn<br>O<br>O,Zn    | $r_s < 2.5$<br>$r_s < 4.0$<br>$r_s \in [2.5,4.0[$<br>$r_s \geq 4.0$                   | 6, 6, 6                         | 600                         | 2300                   |
| 57        | [Al <sub>2</sub> V <sub>Zn</sub> ] <i>ii</i>  | 42                           | [Al <sub>2</sub> Zn <sub>46</sub> O <sub>49</sub> ] <sup>0</sup> | same as in calc. 56                                                   |                            |                                                                                       | 6, 6, 6                         | 600                         | 2300                   |
| 58        | [Al <sub>2</sub> V <sub>Zn</sub> ] <i>iii</i> | 45                           | [Al <sub>2</sub> Zn <sub>46</sub> O <sub>49</sub> ] <sup>0</sup> | same as in calc. 56                                                   |                            |                                                                                       | 6, 6, 6                         | 600                         | 2300                   |
| 59        | Al <sub>2</sub> O <sub>3</sub> <sup>e</sup>   | --                           | [Al <sub>14</sub> O <sub>21</sub> ] <sup>0</sup>                 | 6-311G(3df)<br>6-31G(d)                                               | Al,O<br>Al,O               | $r_s < 2.5$<br>$r_s \geq 2.5$                                                         | 9, 9, 4                         | 500                         | 2000                   |

<sup>a</sup> Number of VASP calculation, in which the defect structure was optimized (see Table S1).

<sup>b</sup> is the shortest distance to one of the Al atoms in the cluster.

<sup>c</sup> These quantities define the embedding charges.  $N_a, N_b, N_c$  define the replication of the unit cell,  $N_1$  and  $N_2$  the number of atoms in EEIM zones 1 and 2, respectively, and  $N_{rep}$  the number of random checkpoints for the electrostatic potential. For details, ref. <sup>7</sup>

<sup>d</sup> Ahlrichs VTZ set<sup>13</sup>

<sup>e</sup> no defect, but reference compound for chemical shift calculation.

## 7. References

1. Y. Ishii, R. Tycko, *J. Magn. Reson.*, 2000, **142**, 199–204.
2. P. E. Blöchl, O. Jepsen, O. K. Andersen, *Phys. Rev. B*, 1994, **49**, 16223–16233.
3. R. B. Heller, J. McGannon, A. H. Weber, *J. Appl. Phys.*, 1950, **21**, 1283–1284.
4. H. J. Monkhorst, J. D. Pack, *Phys. Rev. B*, 1976, **13**, 5188–5192.
5. H. A. Jahn, E. Teller, *Proc. R. Soc. London, Ser. A*, 1937, **161**, 220–235.
6. Y. S. Avadhut, J. Weber, E. Hammarberg, C. Feldmann, I. Schellenberg, R. Pöttgen, J. Schmedt auf der Günne, *Chem. Mater.*, 2011, **23**, 1526–1538.
7. J. Weber, J. Schmedt auf der Günne, *Phys. Chem. Chem. Phys.*, 2010, **12**, 583–603.
8. A. D. McLean, G. S. Chandler, *J. Chem. Phys.*, 1980, **72**, 5639–5648.
9. M. M. Francl, W. J. Pietro, W. J. Hehre, J. S. Binkley, M. S. Gordon, D. J. DeFrees, J. A. Pople, *J. Chem. Phys.*, 1982, **77**, 3654–3665.
10. V. Rassolov, J. A. Pople, M. Ratner, T. L. Windus, *J. Chem. Phys.*, 1998, **109**, 1223–1129.
11. F. Jensen, *J. Chem. Theory Comput.*, 2008, **4**, 719–727.
12. W. J. Stevens, M. Krauss, H. Basch, P. G. Jasien, *Can. J. Chem.*, 1992, **70**, 612.
13. A. Schäfer, H. Horn, R. Ahlrichs, *J. Chem. Phys.*, 1992, **97**, 2571–2577.
14. K. Wolinski, J. F. Hinton, P. Pulay, *J. Am. Chem. Soc.*, 1990, **112**, 8251–8265.
15. M. J. Alam, D. C. Cameron, *J. Vac. Sci. Technol. A*, 2001, **19**, 1642.
16. N. Ishizawa, T. Miyata, I. Minato, F. Marumo, S. Iwai, *Acta Cryst. B*, 1980, **36**, 228–230.
17. T. Vosegaard, H. J. Jakobsen, *J. Magn. Reson.*, 1997, **128**, 135–137.
18. J. Skibsted, N. C. Nielsen, H. Bildsøe, H. J. Jakobsen, *J. Magn. Reson.*, 1991, **95**, 88–117.
